# Supplementary material for: Bacterial Communities in Semen from Men of Infertile Couples: Metagenomic Sequencing Reveals Relationships of Seminal Microbiota to Semen Quality
Source: PLoS One. 2014 Oct 23;9(10):e110152. doi: 10.1371/journal.pone.0110152 (PMC4207690; doi:10.1371/journal.pone.0110152)
Supplement: Table S4 — Identified genera of bacteria in semen. (XLS) [file pone.0110152.s004.xls]

## Sheet: TABLE_S3
Genus	Taxonomy_ID	Proportion Median	Proportion Mean
Lactobacillus	1578	0.1666	0.199
Pseudomonas	286	0.0781	0.0984
Prevotella	838	0.0573	0.0851
Gardnerella	2701	0.0187	0.0421
Rhodanobacter	75309	0.0212	0.0274
Streptococcus	1301	0.0146	0.0274
Finegoldia	150022	0.0121	0.0273
Haemophilus	724	0.0051	0.0258
Stenotrophomonas	40323	0.0155	0.0211
Clostridium	1485	0.0184	0.0207
Corynebacterium	1716	0.0078	0.0204
Bacillus	1386	0.0162	0.018
Brevibacillus	55080	0.015	0.0172
Staphylococcus	1279	0.0059	0.0146
Escherichia	561	0.0036	0.0141
Campylobacter	194	0.0035	0.0115
Porphyromonas	836	0.0045	0.011
Enterobacter	547	0.008	0.0107
Veillonella	29465	0.0021	0.0104
Bacteroides	816	0.0033	0.0101
Klebsiella	570	0.0075	0.0092
Arthrobacter	1663	0.0045	0.0091
Halomonas	2745	<0.01%	0.0091
Flavobacterium	237	0.0054	0.009
Neisseria	482	<0.01%	0.0087
Propionibacterium	1743	0.0041	0.0077
Dialister	39948	0.003	0.0077
Peptoniphilus	162289	0.0022	0.0075
Fusobacterium	848	0.0007	0.0072
Brevundimonas	41275	0.0043	0.0071
Chryseobacterium	59732	0.0054	0.0067
Citrobacter	544	0.004	0.0067
Janthinobacterium	29580	0.0051	0.0061
Ochrobactrum	528	0.0049	0.0057
Microbacterium	33882	0.0017	0.0057
Cellulosimicrobium	157920	0.004	0.0056
Salmonella	590	0.0015	0.0056
Atopobium	1380	0.0024	0.0055
Sporobacterium	100132	0.0003	0.0055
Anaerococcus	165779	0.0013	0.0049
Burkholderia	32008	0.0008	0.0047
Delftia	80865	0.0038	0.0043
Actinomyces	1654	0.0007	0.0041
Comamonas	283	0.0029	0.004
Shigella	620	0.0006	0.004
Acidovorax	12916	0.0023	0.0035
Leptotrichia	32067	0.0003	0.0031
Propionimicrobium	203133	<0.01%	0.003
Mobiluncus	2050	0.0002	0.0029
Massilia	149698	0.0019	0.0028
Brevibacterium	1696	0.0003	0.0028
Thermus	270	<0.01%	0.0026
Actinobaculum	76833	0.0001	0.0025
Curvibacter	281915	0.0011	0.0024
Paenibacillus	44249	0.0018	0.0023
Megasphaera	906	0.0004	0.0023
Peptostreptococcus	1257	0.0007	0.0022
Aerococcus	1375	<0.01%	0.0022
Rothia	32207	<0.01%	0.0021
Pasteurella	745	0.0011	0.002
Lactococcus	1357	<0.01%	0.002
Ensifer	106591	0.0013	0.0019
Akkermansia	239934	<0.01%	0.0019
Methylobacterium	407	0.0015	0.0018
Paracoccus	265	0.0012	0.0018
Sphingobacterium	28453	0.0013	0.0017
Pedobacter	84567	0.0013	0.0017
Pelomonas	335058	0.0012	0.0017
Variovorax	34072	0.0007	0.0017
Enterococcus	1350	0.0003	0.0017
Flexibacter	992	0.0013	0.0016
Bifidobacterium	1678	<0.01%	0.0016
Sphingobium	165695	<0.01%	0.0016
Pantoea	53335	0.0009	0.0015
Sneathia	168808	0.0001	0.0015
Varibaculum	184869	<0.01%	0.0015
Aggregatibacter	416916	<0.01%	0.0015
Negativicoccus	909928	<0.01%	0.0015
Agromyces	33877	0.0009	0.0013
Raoultella	160674	0.0007	0.0013
Shewanella	22	<0.01%	0.0013
Mycoplasma	2093	<0.01%	0.0012
Dermacoccus	57495	<0.01%	0.0012
Mycobacterium	1763	0.0007	0.0011
Microvirgula	57479	0.0006	0.0011
Undibacterium	401469	0.0006	0.0011
Eubacterium	1730	0.0004	0.0011
Pseudoxanthomonas	83618	0.0004	0.001
Caulobacter	75	0.0005	0.0009
Achromobacter	222	0.0004	0.0009
Polaromonas	52972	0.0004	0.0009
Anoxybacillus	150247	<0.01%	0.0009
Rhodocyclus	1064	0.0004	0.0008
Allisonella	209879	0.0002	0.0008
Moraxella	475	0.0001	0.0008
Dermabacter	36739	<0.01%	0.0008
Bdellovibrio	958	0.0004	0.0007
Dietzia	37914	0.0002	0.0007
Janibacter	53457	0.0002	0.0007
Terrahaemophilus	217201	<0.01%	0.0007
Cellulomonas	1707	0.0004	0.0006
Azospira	146937	0.0004	0.0006
Rhizobium	379	0.0003	0.0006
Catonella	43996	<0.01%	0.0006
Erwinia	551	0.0003	0.0005
Cellvibrio	10	0.0002	0.0005
Alcaligenes	507	0.0002	0.0005
Devosia	46913	0.0002	0.0005
Leucobacter	55968	0.0002	0.0005
Rubrobacter	42255	<0.01%	0.0005
Lautropia	47670	<0.01%	0.0005
Eggerthella	84111	<0.01%	0.0005
Granulicatella	117563	<0.01%	0.0005
Turicibacter	191303	<0.01%	0.0005
Moryella	437755	<0.01%	0.0005
Mycoplana	13159	0.0003	0.0004
Serratia	613	0.0002	0.0004
Bosea	85413	0.0002	0.0004
Microvirga	186650	0.0002	0.0004
Elizabethkingia	308865	0.0002	0.0004
Yersinia	629	0.0001	0.0004
Mesorhizobium	68287	0.0001	0.0004
Zoogloea	349	<0.01%	0.0004
Erythrobacter	1041	<0.01%	0.0004
Streptobacillus	34104	<0.01%	0.0004
Hydrogenophilus	70774	<0.01%	0.0004
Asticcacaulis	76890	<0.01%	0.0004
Novosphingobium	165696	<0.01%	0.0004
Limnohabitans	665874	<0.01%	0.0004
Agrobacterium	357	0.0002	0.0003
Kluyvera	579	0.0001	0.0003
Herbaspirillum	963	0.0001	0.0003
Streptomyces	1883	0.0001	0.0003
Rhodoferax	28065	0.0001	0.0003
Ralstonia	48736	0.0001	0.0003
Cedecea	158483	0.0001	0.0003
Methylophilus	16	<0.01%	0.0003
Chlamydia	810	<0.01%	0.0003
Cytophaga	978	<0.01%	0.0003
Tsukamurella	2060	<0.01%	0.0003
Facklamia	66831	<0.01%	0.0003
Oribacterium	265975	<0.01%	0.0003
Cronobacter	413496	<0.01%	0.0003
Alloscardovia	419014	<0.01%	0.0003
Candidatus Rhodoluna	529883	<0.01%	0.0003
Aminobacter	31988	0.0001	0.0002
Methylobacillus	404	<0.01%	0.0002
Legionella	445	<0.01%	0.0002
Morganella	581	<0.01%	0.0002
Aeromonas	642	<0.01%	0.0002
Actinobacillus	713	<0.01%	0.0002
Capnocytophaga	1016	<0.01%	0.0002
Micrococcus	1269	<0.01%	0.0002
Deinococcus	1298	<0.01%	0.0002
Sporosarcina	1569	<0.01%	0.0002
Rhodococcus	1827	<0.01%	0.0002
Telluria	34069	<0.01%	0.0002
Sutterella	40544	<0.01%	0.0002
Polynucleobacter	44013	<0.01%	0.0002
Filifactor	44259	<0.01%	0.0002
Hydrogenophaga	47420	<0.01%	0.0002
Thermothrix	48381	<0.01%	0.0002
Prosthecobacter	48463	<0.01%	0.0002
Bergeyella	59735	<0.01%	0.0002
Aquamicrobium	69278	<0.01%	0.0002
Dechloromonas	73029	<0.01%	0.0002
Mannheimia	75984	<0.01%	0.0002
Rubrimonas	89523	<0.01%	0.0002
Solobacterium	123375	<0.01%	0.0002
Roseomonas	125216	<0.01%	0.0002
Anaeroglobus	156454	<0.01%	0.0002
Ramlibacter	174951	<0.01%	0.0002
Arcicella	217140	<0.01%	0.0002
Dokdonella	323413	<0.01%	0.0002
Fluviicola	332102	<0.01%	0.0002
Paludibacter	346096	<0.01%	0.0002
Pseudochrobactrum	354349	<0.01%	0.0002
Jonquetella	428711	<0.01%	0.0002
Phenylobacterium	20	<0.01%	0.0001
Hyphomicrobium	81	<0.01%	0.0001
Spirosoma	107	<0.01%	0.0001
Gemmata	113	<0.01%	0.0001
Treponema	157	<0.01%	0.0001
Aquaspirillum	187	<0.01%	0.0001
Azospirillum	191	<0.01%	0.0001
Bordetella	517	<0.01%	0.0001
Proteus	583	<0.01%	0.0001
Providencia	586	<0.01%	0.0001
Vibrio	662	<0.01%	0.0001
Fibrobacter	832	<0.01%	0.0001
Oxalobacter	846	<0.01%	0.0001
Desulfovibrio	872	<0.01%	0.0001
Nitrobacter	911	<0.01%	0.0001
Selenomonas	970	<0.01%	0.0001
Afipia	1033	<0.01%	0.0001
Rhodobacter	1060	<0.01%	0.0001
Nitrospira	1234	<0.01%	0.0001
Nocardioides	1839	<0.01%	0.0001
Curtobacterium	2034	<0.01%	0.0001
Haliscomenobacter	2349	<0.01%	0.0001
Peptococcus	2740	<0.01%	0.0001
Sinorhizobium	28105	<0.01%	0.0001
Arcobacter	28196	<0.01%	0.0001
Arcanobacterium	28263	<0.01%	0.0001
Thauera	33057	<0.01%	0.0001
Acidobacterium	33973	<0.01%	0.0001
Nitrosospira	35798	<0.01%	0.0001
Johnsonella	43994	<0.01%	0.0001
Halobacillus	45667	<0.01%	0.0001
Nakamurella	53460	<0.01%	0.0001
Aneurinibacillus	55079	<0.01%	0.0001
Kocuria	57493	<0.01%	0.0001
Sulfurospirillum	57665	<0.01%	0.0001
Nevskia	64001	<0.01%	0.0001
Cryobacterium	69578	<0.01%	0.0001
Macrococcus	69965	<0.01%	0.0001
Frateuria	70411	<0.01%	0.0001
Duganella	75654	<0.01%	0.0001
Buttiauxella	82976	<0.01%	0.0001
Leclercia	83654	<0.01%	0.0001
Pandoraea	93217	<0.01%	0.0001
Leifsonia	110932	<0.01%	0.0001
Dyadobacter	120831	<0.01%	0.0001
Pectobacterium	122277	<0.01%	0.0001
Geobacillus	129337	<0.01%	0.0001
Thermomonas	141948	<0.01%	0.0001
Azonexus	146936	<0.01%	0.0001
Xenophilus	151754	<0.01%	0.0001
Dysgonomonas	156973	<0.01%	0.0001
Scardovia	196081	<0.01%	0.0001
Alicycliphilus	201096	<0.01%	0.0001
Skermanella	204447	<0.01%	0.0001
Rhizobacter	212743	<0.01%	0.0001
Enhydrobacter	212791	<0.01%	0.0001
Schlegelella	215579	<0.01%	0.0001
Alkanindiges	222991	<0.01%	0.0001
Petrobacter	224435	<0.01%	0.0001
Byssovorax	224459	<0.01%	0.0001
Diaphorobacter	238749	<0.01%	0.0001
Alistipes	239759	<0.01%	0.0001
Proteiniphilum	294702	<0.01%	0.0001
Brooklawnia	369926	<0.01%	0.0001
Lysinibacillus	400634	<0.01%	0.0001
Aquitalea	407217	<0.01%	0.0001
Steroidobacter	469322	<0.01%	0.0001
Haliea	475794	<0.01%	0.0001
Arenimonas	490567	<0.01%	0.0001
Novispirillum	660514	<0.01%	0.0001
Kinneretia	683756	<0.01%	0.0001
Armatimonas	1042315	<0.01%	0.0001
Lonsdalea	1082702	<0.01%	0.0001
Murdochiella	1161127	<0.01%	0.0001
Azorhizobium	6	<0.01%	<0.01%
Pelobacter	18	<0.01%	<0.01%
Cystobacter	42	<0.01%	<0.01%
Chondromyces	50	<0.01%	<0.01%
Vitreoscilla	59	<0.01%	<0.01%
Lysobacter	68	<0.01%	<0.01%
Simonsiella	71	<0.01%	<0.01%
Hyphomonas	85	<0.01%	<0.01%
Gallionella	96	<0.01%	<0.01%
Ancylobacter	99	<0.01%	<0.01%
Flectobacillus	101	<0.01%	<0.01%
Runella	105	<0.01%	<0.01%
Blastobacter	109	<0.01%	<0.01%
Planctomyces	118	<0.01%	<0.01%
Pirellula	123	<0.01%	<0.01%
Isosphaera	127	<0.01%	<0.01%
Spirochaeta	146	<0.01%	<0.01%
Leptospira	171	<0.01%	<0.01%
Leptospirillum	179	<0.01%	<0.01%
Helicobacter	209	<0.01%	<0.01%
Brucella	234	<0.01%	<0.01%
Xanthobacter	279	<0.01%	<0.01%
Xanthomonas	338	<0.01%	<0.01%
Bradyrhizobium	374	<0.01%	<0.01%
Methylosinus	425	<0.01%	<0.01%
Methylobacter	429	<0.01%	<0.01%
Psychrobacter	497	<0.01%	<0.01%
Thermomicrobium	499	<0.01%	<0.01%
Chromobacterium	535	<0.01%	<0.01%
Eikenella	538	<0.01%	<0.01%
Hafnia	568	<0.01%	<0.01%
Xenorhabdus	626	<0.01%	<0.01%
Edwardsiella	635	<0.01%	<0.01%
Bartonella	773	<0.01%	<0.01%
Rickettsia	780	<0.01%	<0.01%
Butyrivibrio	830	<0.01%	<0.01%
Roseburia	841	<0.01%	<0.01%
Wolinella	843	<0.01%	<0.01%
Desulfobulbus	893	<0.01%	<0.01%
Desulfomicrobium	898	<0.01%	<0.01%
Acidaminococcus	904	<0.01%	<0.01%
Nitrosomonas	914	<0.01%	<0.01%
Thiobacillus	919	<0.01%	<0.01%
Sporocytophaga	1011	<0.01%	<0.01%
Beggiatoa	1021	<0.01%	<0.01%
Rhodomicrobium	1068	<0.01%	<0.01%
Rhodopseudomonas	1073	<0.01%	<0.01%
Chloroflexus	1107	<0.01%	<0.01%
Porphyrobacter	1111	<0.01%	<0.01%
Nitrosococcus	1227	<0.01%	<0.01%
Leuconostoc	1243	<0.01%	<0.01%
Pediococcus	1253	<0.01%	<0.01%
Ruminococcus	1263	<0.01%	<0.01%
Planococcus	1372	<0.01%	<0.01%
Renibacterium	1645	<0.01%	<0.01%
Erysipelothrix	1647	<0.01%	<0.01%
Kurthia	1649	<0.01%	<0.01%
Nocardia	1817	<0.01%	<0.01%
Pseudonocardia	1847	<0.01%	<0.01%
Frankia	1854	<0.01%	<0.01%
Geodermatophilus	1860	<0.01%	<0.01%
Actinoplanes	1865	<0.01%	<0.01%
Aeromicrobium	2040	<0.01%	<0.01%
Pimelobacter	2044	<0.01%	<0.01%
Gordonia	2053	<0.01%	<0.01%
Sphaerobacter	2056	<0.01%	<0.01%
Saccharothrix	2071	<0.01%	<0.01%
Ureaplasma	2129	<0.01%	<0.01%
Methanobacterium	2160	<0.01%	<0.01%
Flexistipes	2351	<0.01%	<0.01%
Roseobacter	2433	<0.01%	<0.01%
Cardiobacterium	2717	<0.01%	<0.01%
Verrucomicrobium	2735	<0.01%	<0.01%
Carnobacterium	2747	<0.01%	<0.01%
Synergistes	2753	<0.01%	<0.01%
Azoarcus	12960	<0.01%	<0.01%
Magnetospirillum	13134	<0.01%	<0.01%
Phyllobacterium	28100	<0.01%	<0.01%
Chelatococcus	28209	<0.01%	<0.01%
Brachymonas	28219	<0.01%	<0.01%
Geobacter	28231	<0.01%	<0.01%
Marinomonas	28253	<0.01%	<0.01%
Amphibacillus	29331	<0.01%	<0.01%
Microlunatus	29404	<0.01%	<0.01%
Rhodoplanes	29407	<0.01%	<0.01%
Photorhabdus	29487	<0.01%	<0.01%
Kingella	32257	<0.01%	<0.01%
Phascolarctobacterium	33024	<0.01%	<0.01%
Coprococcus	33042	<0.01%	<0.01%
Rathayibacter	33886	<0.01%	<0.01%
Acetobacterium	33951	<0.01%	<0.01%
Rhodovulum	34008	<0.01%	<0.01%
Rahnella	34037	<0.01%	<0.01%
Riemerella	34084	<0.01%	<0.01%
Erythromicrobium	35810	<0.01%	<0.01%
Bilophila	35832	<0.01%	<0.01%
Holophaga	35838	<0.01%	<0.01%
Desulfitobacterium	36853	<0.01%	<0.01%
Blastococcus	38501	<0.01%	<0.01%
Zymophilus	39949	<0.01%	<0.01%
Ewingella	41201	<0.01%	<0.01%
Tissierella	41273	<0.01%	<0.01%
Brachybacterium	43668	<0.01%	<0.01%
Promicromonospora	43676	<0.01%	<0.01%
Tolumonas	43947	<0.01%	<0.01%
Geothrix	44675	<0.01%	<0.01%
Salinicoccus	45669	<0.01%	<0.01%
Abiotrophia	46123	<0.01%	<0.01%
Agrococcus	46352	<0.01%	<0.01%
Pedomicrobium	47494	<0.01%	<0.01%
Candidatus Arthromitus	49082	<0.01%	<0.01%
Acidocella	50709	<0.01%	<0.01%
Pseudoalteromonas	53246	<0.01%	<0.01%
Terrabacter	53355	<0.01%	<0.01%
Friedmanniella	53387	<0.01%	<0.01%
Schwartzia	55506	<0.01%	<0.01%
Sandaracinobacter	56358	<0.01%	<0.01%
Amaricoccus	56999	<0.01%	<0.01%
Malonomonas	57039	<0.01%	<0.01%
Nesterenkonia	57494	<0.01%	<0.01%
Kytococcus	57499	<0.01%	<0.01%
Vogesella	57739	<0.01%	<0.01%
Aranicola	58337	<0.01%	<0.01%
Rickettsiella	59195	<0.01%	<0.01%
Sanguibacter	60919	<0.01%	<0.01%
Methylopila	61653	<0.01%	<0.01%
Acidaminobacter	65402	<0.01%	<0.01%
Ammoniphilus	66862	<0.01%	<0.01%
Rheinheimera	67575	<0.01%	<0.01%
Brenneria	71655	<0.01%	<0.01%
Tessaracoccus	72763	<0.01%	<0.01%
Fusibacter	76008	<0.01%	<0.01%
Mycetocola	76634	<0.01%	<0.01%
Paracraurococcus	77674	<0.01%	<0.01%
Aminomonas	81411	<0.01%	<0.01%
Methylovorus	81682	<0.01%	<0.01%
Prosthecomicrobium	81894	<0.01%	<0.01%
Desemzia	82800	<0.01%	<0.01%
Trichococcus	82802	<0.01%	<0.01%
Budvicia	82978	<0.01%	<0.01%
Tatumella	82986	<0.01%	<0.01%
Corallococcus	83461	<0.01%	<0.01%
Parachlamydia	83551	<0.01%	<0.01%
Luteimonas	83614	<0.01%	<0.01%
Propionivibrio	83766	<0.01%	<0.01%
Slackia	84108	<0.01%	<0.01%
Virgibacillus	84406	<0.01%	<0.01%
Williamsia	85043	<0.01%	<0.01%
Halochromatium	85074	<0.01%	<0.01%
Mogibacterium	86331	<0.01%	<0.01%
Marmoricola	86795	<0.01%	<0.01%
Modestobacter	88138	<0.01%	<0.01%
Ferribacterium	88875	<0.01%	<0.01%
Gluconacetobacter	89583	<0.01%	<0.01%
Hymenobacter	89966	<0.01%	<0.01%
Pseudaminobacter	93368	<0.01%	<0.01%
Frigoribacterium	96492	<0.01%	<0.01%
Tetrasphaera	99479	<0.01%	<0.01%
Dechlorospirillum	100867	<0.01%	<0.01%
Collinsella	102106	<0.01%	<0.01%
Cupriavidus	106589	<0.01%	<0.01%
Thioalkalivibrio	106633	<0.01%	<0.01%
Anaerovorax	109326	<0.01%	<0.01%
Agreia	110934	<0.01%	<0.01%
Alishewanella	111142	<0.01%	<0.01%
Alkaliphilus	114627	<0.01%	<0.01%
Bulleidia	118747	<0.01%	<0.01%
Acidithiobacillus	119977	<0.01%	<0.01%
Salana	120376	<0.01%	<0.01%
Methylocella	120652	<0.01%	<0.01%
Ornithinimicrobium	125287	<0.01%	<0.01%
Limnobacter	131079	<0.01%	<0.01%
Olsenella	133925	<0.01%	<0.01%
Idiomarina	135575	<0.01%	<0.01%
Knoellia	136099	<0.01%	<0.01%
Bacteriovorax	146784	<0.01%	<0.01%
Blastomonas	150203	<0.01%	<0.01%
Pigmentiphaga	152267	<0.01%	<0.01%
Georgenia	154116	<0.01%	<0.01%
Jeotgalibacillus	157226	<0.01%	<0.01%
Sterolibacterium	157591	<0.01%	<0.01%
Paucimonas	157932	<0.01%	<0.01%
Trabulsiella	158851	<0.01%	<0.01%
Yokenella	158876	<0.01%	<0.01%
Methylosarcina	160800	<0.01%	<0.01%
Anaeromyxobacter	161492	<0.01%	<0.01%
Oerskovia	162491	<0.01%	<0.01%
Sphingopyxis	165697	<0.01%	<0.01%
Kaistia	166953	<0.01%	<0.01%
Gemmatimonas	173479	<0.01%	<0.01%
Anaerophaga	177399	<0.01%	<0.01%
Shuttleworthia	177971	<0.01%	<0.01%
Aurantimonas	182269	<0.01%	<0.01%
Agitococcus	186829	<0.01%	<0.01%
Acetoanaerobium	186831	<0.01%	<0.01%
Jannaschia	188905	<0.01%	<0.01%
Plantibacter	190323	<0.01%	<0.01%
Sedimentibacter	190972	<0.01%	<0.01%
Conexibacter	191494	<0.01%	<0.01%
Tannerella	195950	<0.01%	<0.01%
Caldimonas	196013	<0.01%	<0.01%
Okibacterium	196084	<0.01%	<0.01%
Paraliobacillus	200903	<0.01%	<0.01%
Sulfurimonas	202746	<0.01%	<0.01%
Collimonas	202907	<0.01%	<0.01%
Derxia	203697	<0.01%	<0.01%
Gemmobacter	204456	<0.01%	<0.01%
Gemmiger	204475	<0.01%	<0.01%
Labrys	204476	<0.01%	<0.01%
Cryocola	205841	<0.01%	<0.01%
Parvularcula	208215	<0.01%	<0.01%
Morococcus	212742	<0.01%	<0.01%
Faecalibacterium	216851	<0.01%	<0.01%
Ottowia	219181	<0.01%	<0.01%
Catellibacterium	220342	<0.01%	<0.01%
Grimontella	223385	<0.01%	<0.01%
Oxalicibacterium	223927	<0.01%	<0.01%
Jeotgalicoccus	227979	<0.01%	<0.01%
Dyella	231454	<0.01%	<0.01%
Hylemonella	232523	<0.01%	<0.01%
Salinibacterium	235888	<0.01%	<0.01%
Propionicimonas	236052	<0.01%	<0.01%
Fastidiosipila	236752	<0.01%	<0.01%
Pseudorhodobacter	238783	<0.01%	<0.01%
Luteibacter	242605	<0.01%	<0.01%
Hydrocarboniphaga	243627	<0.01%	<0.01%
Anaerospora	244825	<0.01%	<0.01%
Nitratireductor	245876	<0.01%	<0.01%
Crocinitomix	246873	<0.01%	<0.01%
Algoriphagus	246875	<0.01%	<0.01%
Mucispirillum	248038	<0.01%	<0.01%
Isoptericola	254250	<0.01%	<0.01%
Pseudoclavibacter	255204	<0.01%	<0.01%
Parvibaculum	256616	<0.01%	<0.01%
Gulosibacter	256818	<0.01%	<0.01%
Pleomorphomonas	261933	<0.01%	<0.01%
Malikia	263066	<0.01%	<0.01%
Peredibacter	263370	<0.01%	<0.01%
Aquimonas	265718	<0.01%	<0.01%
Serinicoccus	265976	<0.01%	<0.01%
Nitrobacteria	267929	<0.01%	<0.01%
Candidatus Protochlamydia	282132	<0.01%	<0.01%
Odoribacter	283168	<0.01%	<0.01%
Roseivirga	290180	<0.01%	<0.01%
Atopostipes	292480	<0.01%	<0.01%
Subdoligranulum	292632	<0.01%	<0.01%
Candidatus Rhabdochlamydia	292833	<0.01%	<0.01%
Martelella	293088	<0.01%	<0.01%
Sejongia	293618	<0.01%	<0.01%
Rubellimicrobium	295418	<0.01%	<0.01%
Kaistobacter	298705	<0.01%	<0.01%
Uruburuella	299568	<0.01%	<0.01%
Pusillimonas	305976	<0.01%	<0.01%
Thiovirga	307586	<0.01%	<0.01%
Denitratisoma	311181	<0.01%	<0.01%
Azohydromonas	312063	<0.01%	<0.01%
Emticicia	312278	<0.01%	<0.01%
Sideroxydans	314343	<0.01%	<0.01%
Leadbetterella	319458	<0.01%	<0.01%
Pontibacter	323449	<0.01%	<0.01%
Shinella	323620	<0.01%	<0.01%
Cohnella	329857	<0.01%	<0.01%
Larkinella	332157	<0.01%	<0.01%
Bergeriella	334108	<0.01%	<0.01%
Tiedjeia	336377	<0.01%	<0.01%
Microcella	337004	<0.01%	<0.01%
Turneriella	338321	<0.01%	<0.01%
Wautersiella	343873	<0.01%	<0.01%
Averyella	347014	<0.01%	<0.01%
Giesbergeria	352449	<0.01%	<0.01%
Simplicispira	352450	<0.01%	<0.01%
Epilithonimonas	358033	<0.01%	<0.01%
Methylotenera	359407	<0.01%	<0.01%
Rubritalea	361050	<0.01%	<0.01%
Altererythrobacter	361177	<0.01%	<0.01%
Patulibacter	361607	<0.01%	<0.01%
Sandarakinorhabdus	362865	<0.01%	<0.01%
Humicoccus	363629	<0.01%	<0.01%
Belnapia	365532	<0.01%	<0.01%
Haematobacter	366614	<0.01%	<0.01%
Phycicoccus	367298	<0.01%	<0.01%
Parabacteroides	375288	<0.01%	<0.01%
Methyloversatilis	378210	<0.01%	<0.01%
Sporotalea	380083	<0.01%	<0.01%
Panacagrimonas	381430	<0.01%	<0.01%
Edaphobacter	388463	<0.01%	<0.01%
Uliginosibacterium	392735	<0.01%	<0.01%
Crocinobacterium	397279	<0.01%	<0.01%
Barnesiella	397864	<0.01%	<0.01%
Sufflavibacter	399942	<0.01%	<0.01%
Actinomycetospora	402649	<0.01%	<0.01%
Parapedobacter	416949	<0.01%	<0.01%
Mucilaginibacter	423349	<0.01%	<0.01%
Pseudacidovorax	433923	<0.01%	<0.01%
Oscillibacter	459786	<0.01%	<0.01%
Singulisphaera	466152	<0.01%	<0.01%
Iamia	467975	<0.01%	<0.01%
Longilinea	475961	<0.01%	<0.01%
Candidatus Planktoluna	500014	<0.01%	<0.01%
Cloacibacterium	501783	<0.01%	<0.01%
Candidatus Limnoluna	507002	<0.01%	<0.01%
Cloacibacillus	508459	<0.01%	<0.01%
Luteolibacter	518753	<0.01%	<0.01%
Candidatus Aquirestis	526862	<0.01%	<0.01%
Candidatus Aquiluna	529881	<0.01%	<0.01%
Psychrosinus	552808	<0.01%	<0.01%
Lishizhenia	559293	<0.01%	<0.01%
Nubsella	565005	<0.01%	<0.01%
Sinobacter	568391	<0.01%	<0.01%
Blautia	572511	<0.01%	<0.01%
Enterorhabdus	580024	<0.01%	<0.01%
Pyramidobacter	638847	<0.01%	<0.01%
Solibacillus	648800	<0.01%	<0.01%
Chelonobacter	658623	<0.01%	<0.01%
Planobacterium	659694	<0.01%	<0.01%
Perlucidibaca	661182	<0.01%	<0.01%
Ilumatobacter	682522	<0.01%	<0.01%
Siphonobacter	700450	<0.01%	<0.01%
Desulfocurvus	700595	<0.01%	<0.01%
Pseudorhodoferax	747294	<0.01%	<0.01%
Fibrella	861914	<0.01%	<0.01%
Candidatus Cuticobacterium	862793	<0.01%	<0.01%
Herbiconiux	881616	<0.01%	<0.01%
Albidiferax	885497	<0.01%	<0.01%
Chryseomicrobium	889388	<0.01%	<0.01%
Necropsobacter	908284	<0.01%	<0.01%
Angustibacter	908626	<0.01%	<0.01%
Soonwooa	944321	<0.01%	<0.01%
Miniimonas	947525	<0.01%	<0.01%
Okadaella	948104	<0.01%	<0.01%
Paenochrobactrum	999488	<0.01%	<0.01%
Sulfuritalea	1054211	<0.01%	<0.01%
Flexivirga	1096776	<0.01%	<0.01%
Gaiella	1154586	<0.01%	<0.01%
Calidifontibacter	1158982	<0.01%	<0.01%
Lachnoanaerobaculum	1164882	<0.01%	<0.01%
